# Supplementary material for: Multicomponent polymerization: development of a one-pot synthetic route to functional polymers using diyne, N-sulfonyl azide and water/ethanol as reactants
Source: Royal Society of Chemistry journal article supplement (doi:10.1039/c6py01337f), 2016-01-01
Supplement: c6py01337f1.pdf [file c6py01337f1.pdf]

Electronic Supporting Information

# Multicomponent polymerization: development of one-pot synthetic route to functional polymers using diyne, *N*- sulfonyl azide and water/ethanol as reactants

Haiqin Deng,<sup>ab</sup> Ting Han,<sup>ab</sup> Engui Zhao,<sup>ab</sup> Ryan T. K. Kwok,<sup>ab</sup> Jacky W. Y. Lam<sup>\*ab</sup> and Ben

Zhong Tang<sup>\*abc</sup>

<sup>a</sup> Department of Chemistry, Hong Kong Branch of Chinese National Engineering Research Center for Tissue Restoration and Reconstruction, Institute for Advanced Study, Institute of Molecular Functional Materials, Division of Biomedical Engineering, Division of Life Science and State Key Laboratory of Molecular Neuroscience, The Hong Kong University of Science & Technology (HKUST), Clear Water Bay, Kowloon, Hong Kong.

<sup>b</sup> HKUST-Shenzhen Research Institute, No. 9 Yuexing 1st RD, South Area, Hi-tech Park, Nanshan, Shenzhen 518057, China.

<sup>c</sup> Guangdong Innovative Research Team, SCUT-HKUST Joint Research Laboratory, State Key Laboratory of Luminescent Materials and Devices, South China University of Technology (SCUT), Guangzhou 510640, China.

## Table of contents

**Fig. S1** MALDI-TOF mass spectrum of **5**.

**Fig. S2** MALDI-TOF mass spectrum of **6**.

**Table S1.** Crystal data and structure refinement for **5**.

**Table S2.** Crystal data and structure refinement for **6**.

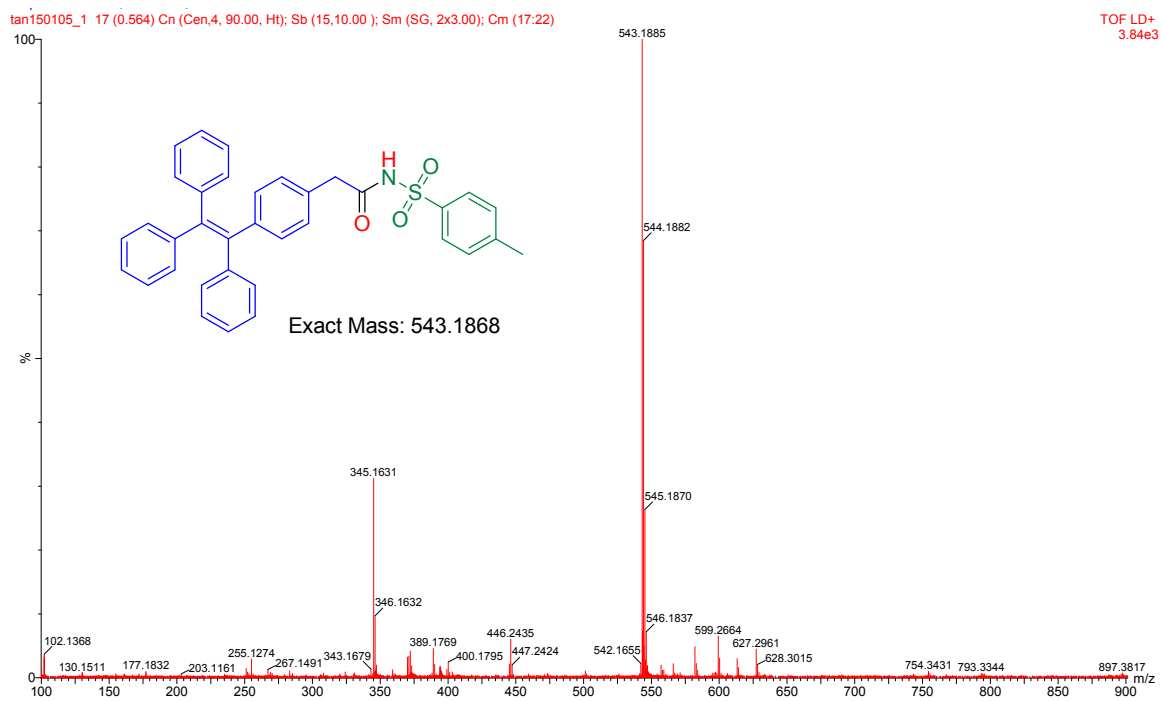

**Fig. S1** MALDI-TOF mass spectrum of **5**.

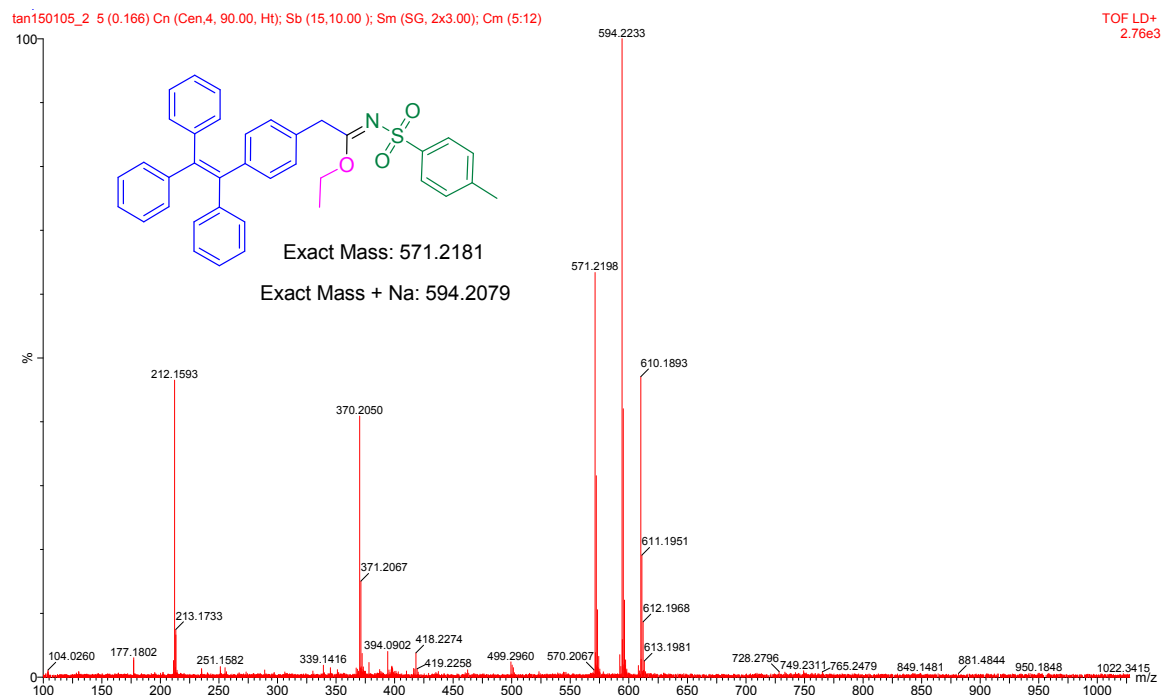

**Fig. S2** MALDI-TOF mass spectrum of **6**.

**Table S1** Crystal data and structure refinement for **5**

|                                 |                                                                   |          |
|---------------------------------|-------------------------------------------------------------------|----------|
| Empirical formula               | C <sub>36</sub> H <sub>31</sub> Cl <sub>2</sub> NO <sub>3</sub> S |          |
| Formula weight                  | 628.58                                                            |          |
| Temperature                     | 99.9(6) K                                                         |          |
| Wavelength                      | 1.54184 Å                                                         |          |
| Crystal system                  | Orthorhombic                                                      |          |
| Space group                     | Fdd2                                                              |          |
| Unit cell dimensions            | a = 128.559(3) Å                                                  | α = 90°. |
|                                 | b = 18.5908(4) Å                                                  | β = 90°. |
|                                 | c = 5.29842(10) Å                                                 | λ = 90°. |
| Volume                          | 12663.3(5) Å <sup>3</sup>                                         |          |
| Z                               | 16                                                                |          |
| Density (calculated)            | 1.319 Mg/m <sup>3</sup>                                           |          |
| Absorption coefficient          | 2.753 mm <sup>-1</sup>                                            |          |
| F(000)                          | 5248                                                              |          |
| Crystal size                    | 0.10 × 0.08 × 0.03 mm <sup>3</sup>                                |          |
| Theta range for data collection | 4.81 to 67.46°.                                                   |          |
| Index ranges                    | -154 ≤ h ≤ 140, -22 ≤ k ≤ 17, -6 ≤ l ≤ 4                          |          |
| Reflections collected           | 12221                                                             |          |
| Independent reflections         | 4619 [R(int) = 0.0393]                                            |          |
| Completeness to theta = 66.50°  | 97.8 %                                                            |          |
| Absorption correction           | Semi-empirical from equivalents                                   |          |
| Max. and min. transmission      | 1.00000 and 0.90763                                               |          |
| Refinement method               | Full-matrix least-squares on F <sup>2</sup>                       |          |

|                                   |                                                   |
|-----------------------------------|---------------------------------------------------|
| Data / restraints / parameters    | 4619 / 7 / 397                                    |
| Goodness-of-fit on F <sup>2</sup> | 1.004                                             |
| Final R indices [I>2sigma(I)]     | R <sub>1</sub> = 0.0428, wR <sub>2</sub> = 0.0969 |
| R indices (all data)              | R <sub>1</sub> = 0.0460, wR <sub>2</sub> = 0.0986 |
| Largest diff. peak and hole       | 0.315 and -0.317 e.Å <sup>-3</sup>                |

**Table S2** Crystal data and structure refinement for **6**

|                                             |                                                               |
|---------------------------------------------|---------------------------------------------------------------|
| Empirical formula                           | C <sub>37</sub> H <sub>33</sub> NO <sub>3</sub> S             |
| Formula weight                              | 571.70                                                        |
| Temperature/K                               | 99.9(6)                                                       |
| Crystal system                              | monoclinic                                                    |
| Space group                                 | P2 <sub>1</sub> /n                                            |
| a/Å                                         | 17.4283(6)                                                    |
| b/Å                                         | 9.6165(2)                                                     |
| c/Å                                         | 19.5792(7)                                                    |
| α/°                                         | 90                                                            |
| β/°                                         | 115.005(4)                                                    |
| γ/°                                         | 90                                                            |
| Volume/Å <sup>3</sup>                       | 2973.89(19)                                                   |
| Z                                           | 4                                                             |
| ρ <sub>calc</sub> /cm <sup>3</sup>          | 1.277                                                         |
| μ/mm <sup>-1</sup>                          | 1.265                                                         |
| F(000)                                      | 1208.0                                                        |
| Crystal size/mm <sup>3</sup>                | 0.2 × 0.15 × 0.03                                             |
| Radiation                                   | CuKα (λ = 1.54184)                                            |
| 2 theta range for data collection/°         | 8.932 to 134.996                                              |
| Index ranges                                | -20 ≤ h ≤ 20, -9 ≤ k ≤ 11, -23 ≤ l ≤ 20                       |
| Reflections collected                       | 15924                                                         |
| Independent reflections                     | 5332 [R <sub>int</sub> = 0.0473, R <sub>sigma</sub> = 0.0474] |
| Data/restraints/parameters                  | 5332/0/381                                                    |
| Completeness to theta = 66.5°               | 99.5%                                                         |
| Goodness-of-fit on F <sup>2</sup>           | 1.002                                                         |
| Final R indexes [I>=2σ (I)]                 | R <sub>1</sub> = 0.0427, wR <sub>2</sub> = 0.1103             |
| Final R indexes [all data]                  | R <sub>1</sub> = 0.0593, wR <sub>2</sub> = 0.1195             |
| Largest diff. peak/hole / e Å <sup>-3</sup> | 0.44/-0.43                                                    |
